# Supplementary material for: Clonal hematopoiesis and inflammation in the vasculature: CHIVE, a prospective, longitudinal clonal hematopoiesis cohort and biorepository
Source: PubMed Central journal article supplement — Blood Adv. 2024 Apr 15;8(13):3453–63. doi: 10.1182/bloodadvances.2023011510 (PMC11259927; doi:10.1182/bloodadvances.2023011510), 2024-04-15
Supplement: BLOODA_ADV-2023-011510-mmc1.pdf [file BLOODA_ADV-2023-011510-mmc1.pdf]

## Supplementary Materials

### *Supplementary Methods*

#### *Development of a Biorepository*

After participants gave informed consent, clinical data available from standard clinical care was collected, including demographic data, medical histories, vital signs, laboratory studies, imaging studies, data from bone marrow biopsies, and clinically ordered genotyping. Genetic data included germline testing, clinical next generation sequencing mutation analyses, and chromosome analyses. Additional cardiovascular studies including electrocardiogram data, and echocardiogram data were collected when available. Upon study enrollment, initial research samples from peripheral blood draws were obtained at the time of planned, routine, clinical sample collection. Similarly, aliquots from bone marrow aspirate and biopsies were procured when available.

Blood samples collected at 6- to 12-month intervals were stored within the *CHIVE* biorepository, a dedicated space with capacity to store peripheral blood and bone marrow samples. Specimens were maintained in a liquid nitrogen freezer with a password protected lock, which was housed in a dedicated laboratory space under supervision. Specimens were assigned a de-identified participant number for archiving to prevent subject identification; patient identifiers were separately stored in a REDcap database, accessible only with secure ID and password.

## Supplementary Figures and Tables

### Supplementary Figures

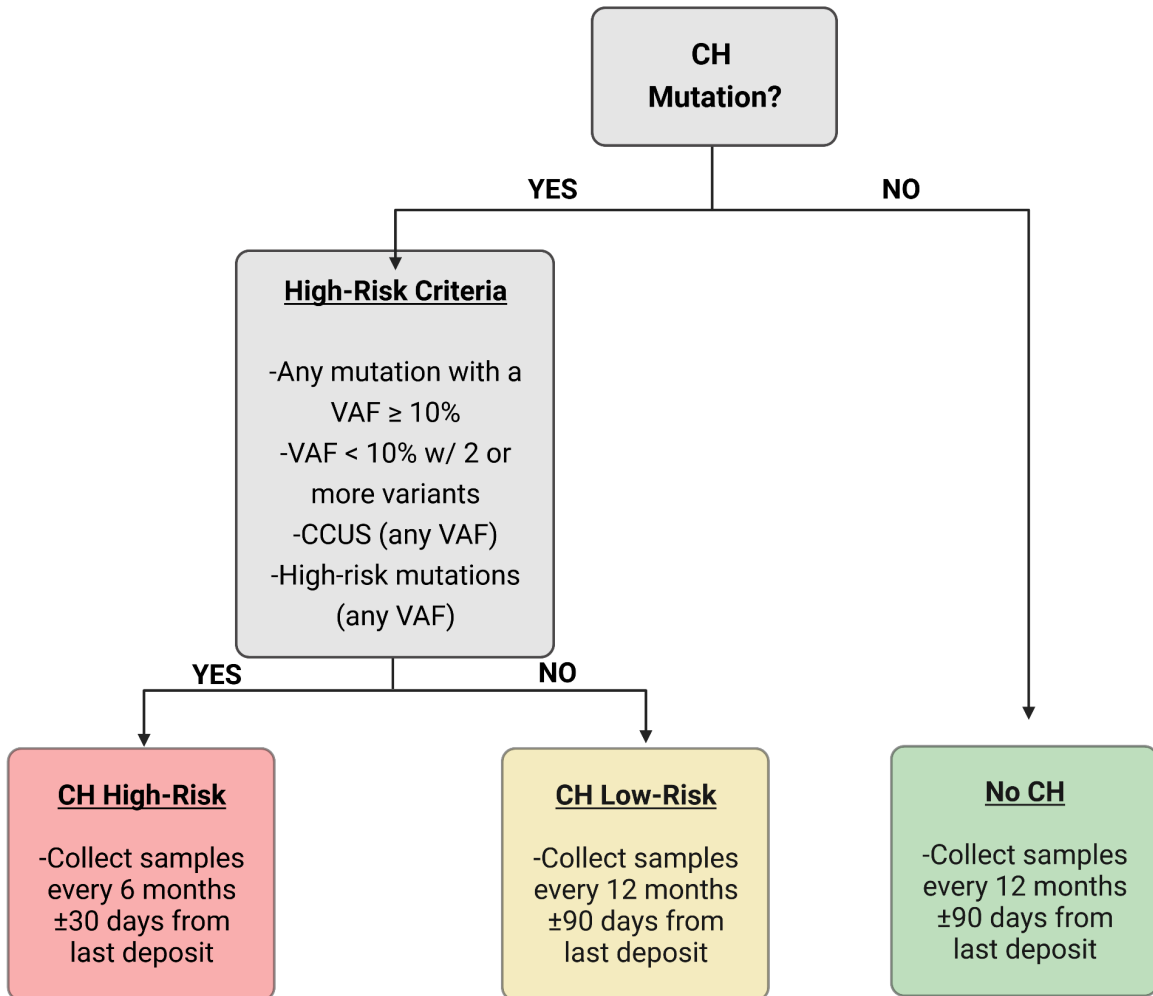

**Supplementary Figure 1.** Rubric used to determine frequency of sample collection for CHIVEseq based on patient risk assessment. Samples were collected approximately every 12 months from patients without CH and from patients with CH but without high-risk clone features. Samples were collected approximately every 6 months from CH patients whose clone met one or more high-risk criteria.

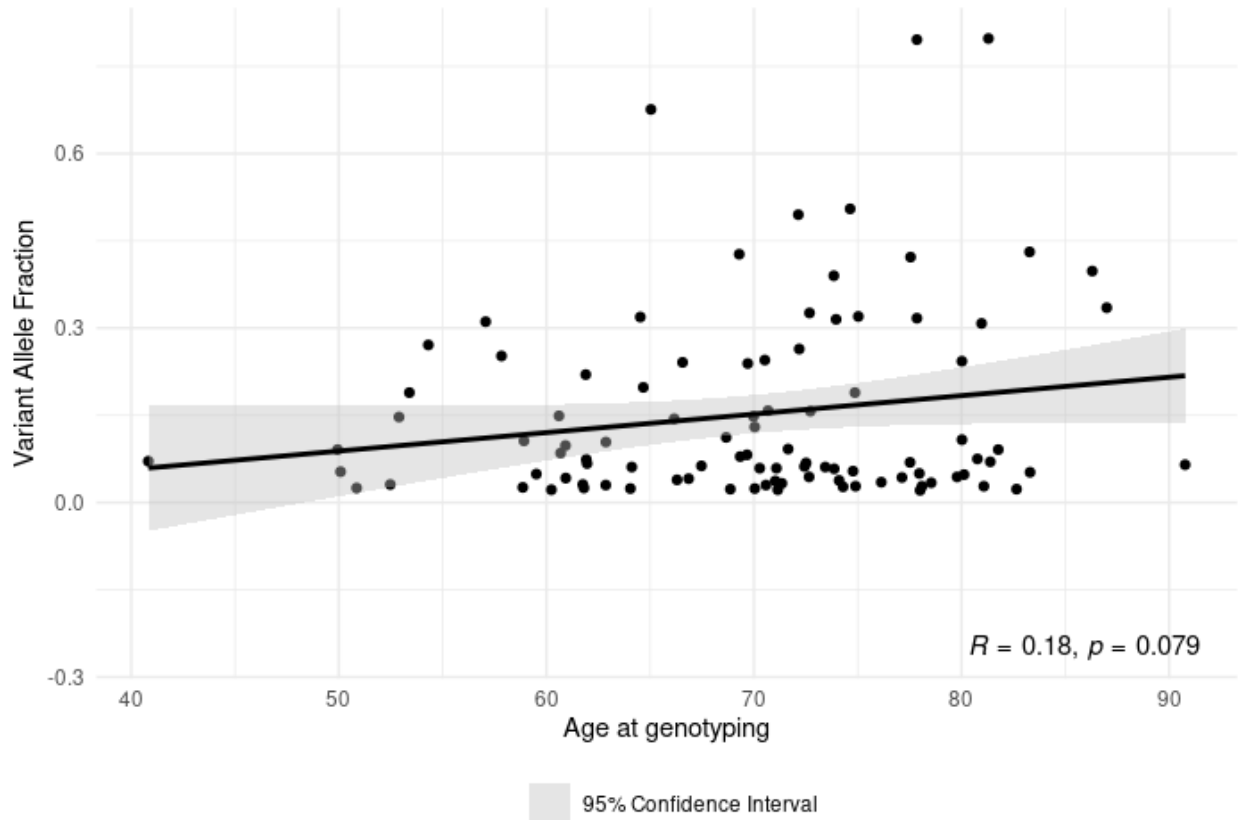

**Supplementary Figure 2.** Scatter plot of the correlation between maximum variant allele fraction (VAF) and age at time of genotyped sample collection. Each dot represents a single CH patient. If a patient had multiple mutated genes and/or multiple samples genotyped, the highest VAF across all genes and time points was selected. A weakly positive but insignificant correlation between age and VAF is shown,  $p = 0.079$ .

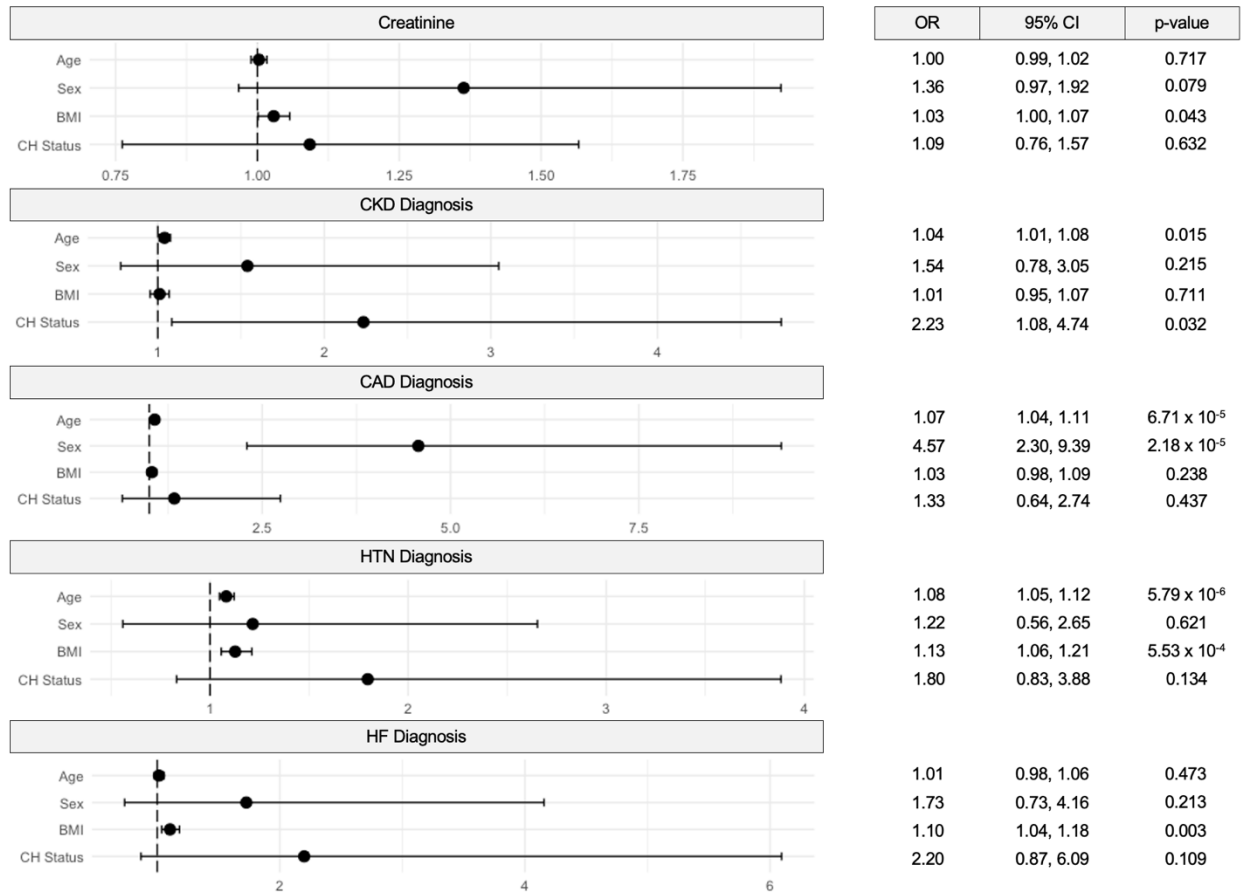

**Supplementary Figure 3.** Forest plots depicting the odds ratio and 95% confidence interval for each covariable included in multivariate regression for those clinical outcomes determined to be significantly different between CH+ and CH- groups. Outcomes for which multivariate regression was performed include creatinine, chronic kidney disease (CKD) diagnosis, coronary artery disease (CAD) diagnosis, hypertension (HTN) diagnosis, and heart failure (HF) diagnosis. For each outcome; age, sex, body mass index (BMI), and CH status were included as variables in multivariate regression.

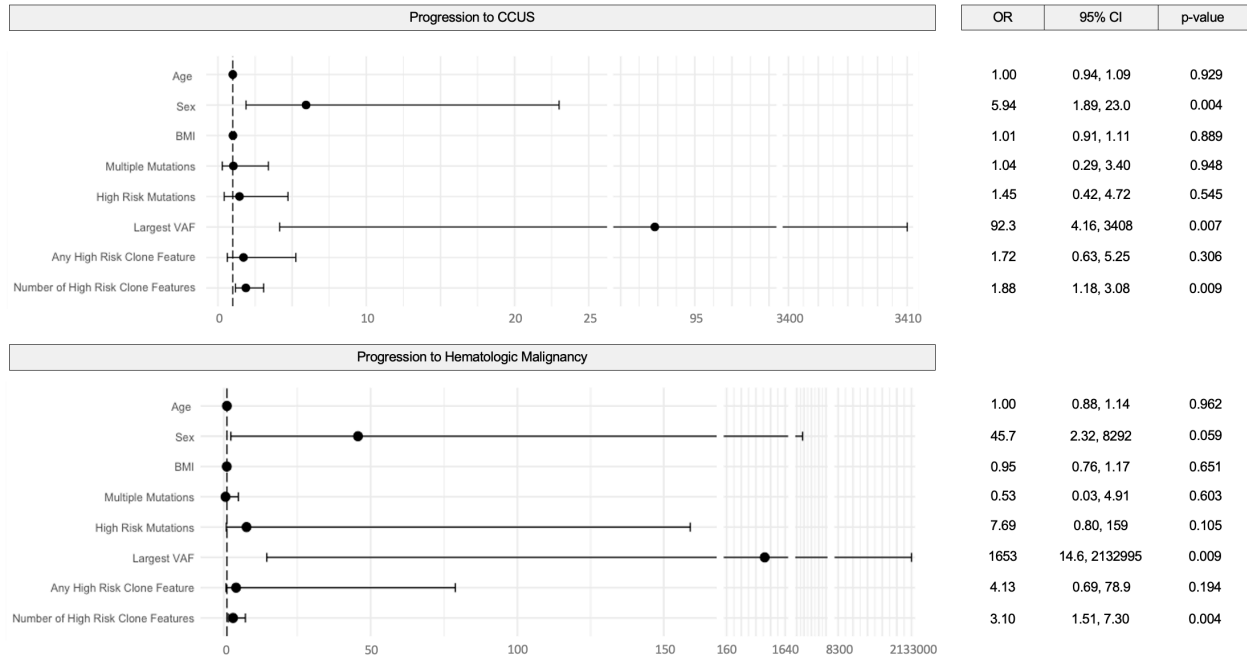

**Supplementary Figure 4.** Forest plots depicting the odds ratio and 95% confidence interval for each covariable included in regression for progression to CCUS and progression to malignancy outcomes. For each outcome, age, sex body mass index (BMI), presence of high-risk mutations, presence of multiple mutations, and largest variant allele fraction (VAF) were included as covariables in the multivariate regression. Association between progression to CCUS or progression to malignancy and presence of any high-risk mutation or number of high-risk mutations were independently assessed via univariate regressions.

*Supplementary Tables*

**Supplementary Data Table 1: Genomic regions included in CHIVEseq assay as CH-associated mutations**

| Gene        | Chromosome | Base Pairs                                                                                                                                                                                                                                            |
|-------------|------------|-------------------------------------------------------------------------------------------------------------------------------------------------------------------------------------------------------------------------------------------------------|
| ASXL1       | 20         | 32358770-32358837; 32359741-32359796; 32366378-32366472; 32369006-32369128; 32428122-32428253; 32428319-32428427; 32429332-32429436; 32429895-32430058; 32431315-32431489; 32431577-32431684; 32432874-32432990; 32433278-32433922; 32434426-32437343 |
| ASXL2       | 2          | 25749689-25750420; 25753532-25753640                                                                                                                                                                                                                  |
| BRCC3/MTCP1 | X          | 155071527-155071650; 155072326-155072343; 155073376-155073431; 155077169-155077289; 155078615-155078703; 155089262-155089351; 155090783-155090839; 155099314-155099389; 155116056-155116188; 155116710-155116754                                      |

|              |    |                                                                                                                                                                                                                                                                                                                                                                                                                                                                                                              |
|--------------|----|--------------------------------------------------------------------------------------------------------------------------------------------------------------------------------------------------------------------------------------------------------------------------------------------------------------------------------------------------------------------------------------------------------------------------------------------------------------------------------------------------------------|
| CBL          | 11 | 119278160-119278302; 119278504-119278718                                                                                                                                                                                                                                                                                                                                                                                                                                                                     |
| DNMT3A       | 2  | 25234273-25234425; 25235701-25235830; 25236930-25237010; 25239124-25239220; 25239484-25239518; 25240296-25240455; 25240634-25240735; 25241556-25241712; 25243892-25243987; 25244149-25244343; 25244534-25244657; 25245247-25245337; 25246014-25246069; 25246154-25246314; 25246614-25246781; 25247045-25247163; 25247585-25247754; 25248031-25248257; 25249651-25249729; 25251906-25252099; 25252188-25252202; 25274935-25275092; 25275494-25275548; 25282382-25282716; 25300133-25300248; 25313907-25313989 |
| ETNK1        | 12 | 22671265-22671359                                                                                                                                                                                                                                                                                                                                                                                                                                                                                            |
| GNAS         | 20 | 58909344-58909428; 58909515-58909584; 58909678-58909809; 58909945-58910086; 58910328-58910406; 58910677-58910834                                                                                                                                                                                                                                                                                                                                                                                             |
| GNB1         | 1  | 1806469-1806543; 1815750-1815867                                                                                                                                                                                                                                                                                                                                                                                                                                                                             |
| IDH1         | 2  | 208243524-208243601; 208248358-208248421                                                                                                                                                                                                                                                                                                                                                                                                                                                                     |
| IDH2         | 15 | 90088655-90088758                                                                                                                                                                                                                                                                                                                                                                                                                                                                                            |
| JAK2         | 9  | 5073683-5073800                                                                                                                                                                                                                                                                                                                                                                                                                                                                                              |
| KIT          | 4  | 54727415-54727542; 54727822-54727927; 54728010-54728121; 54729334-54729485; 54731327-54731419; 54731870-54731998; 54736497-54736609                                                                                                                                                                                                                                                                                                                                                                          |
| KRAS         | 12 | 25225612-25225772; 25227220-25227424; 25245270-25245384                                                                                                                                                                                                                                                                                                                                                                                                                                                      |
| MPL          | 1  | 43349257-43349363                                                                                                                                                                                                                                                                                                                                                                                                                                                                                            |
| NRAS         | 1  | 114713799-114713978; 114716047-114716162                                                                                                                                                                                                                                                                                                                                                                                                                                                                     |
| PPM1D        | 17 | 60662989-60663557                                                                                                                                                                                                                                                                                                                                                                                                                                                                                            |
| SETBP1       | 18 | 44951903-44952002                                                                                                                                                                                                                                                                                                                                                                                                                                                                                            |
| SF3B1        | 2  | 197400049-197400171; 197400246-197400439; 197400709-197400941; 197401394-197401530; 197401736-197401893; 197401979-197402135; 197402550-197402831; 197402943-197403040; 197403579-197403769; 197405070-197405182; 197405269-197405477; 197407992-197408124; 197408363-197408586; 197409764-197410012; 197416735-197416916                                                                                                                                                                                    |
| SRSF2/MFSD11 | 17 | 76736785-76736983                                                                                                                                                                                                                                                                                                                                                                                                                                                                                            |
| TET2         | 4  | 105233891-105237445; 105241333-105241438; 105242828-105242932; 105243564-105243783; 105259613-105259774; 105261753-105261853; 105269604-105269752; 105272558-105272923; 105275042-105276524                                                                                                                                                                                                                                                                                                                  |
| TP53         | 17 | 7669603-7669695; 7670603-7670720; 7673213-7673271; 7673301-7673344; 7673529-7673613; 7673695-7673842; 7674175-7674295; 7674814-7674976; 7675047-7675243; 7675988-7676277; 7676376-7676408; 7676515-7676627                                                                                                                                                                                                                                                                                                   |
| U2AF1        | 21 | 43093096-43093254; 43094461-43094568; 43094649-43094793; 43095432-43095541; 43095688-43095748; 43100447-43100524; 43101274-43101437; 43104309-43104407; 43107445-43107499                                                                                                                                                                                                                                                                                                                                    |
| ZBTB33       | X  | 120253410-120255439                                                                                                                                                                                                                                                                                                                                                                                                                                                                                          |
| ZNF318       | 6  | 43340784-43340913; 43342106-43342216; 43342670-43342884; 43348318-43348630; 43352371-43352481; 43354658-43356150; 43357120-43357770; 43365286-43365445; 43368961-43369370                                                                                                                                                                                                                                                                                                                                    |

**Supplementary Data Table 2: Recruitment sources for all patients in CH+ and CH- groups**

| Recruitment Source  | No CH (n = 82) | CH (n = 99) |
|---------------------|----------------|-------------|
| Hematology/Oncology | 22             | 40          |
| Cardiology          | 23             | 45          |
| Hereditary Cancer   | 35             | 10          |
| Rheumatology        | 2              | 4           |

**Supplementary Data Table 3. Germline Mutations in CH Genes Among CHIVE Patients**

| Sample               | Chr       | Start     | End       | Ref | Alt | Regio<br>n | Gene       | Mutation<br>Type              | RefSeq           | AA Change      | Gnomad<br>AF | ClinVar                  |
|----------------------|-----------|-----------|-----------|-----|-----|------------|------------|-------------------------------|------------------|----------------|--------------|--------------------------|
| 6517-<br>AB-221      | chr<br>4  | 105237193 | 105237193 | A   | C   | exonic     | TET2       | Nonsynon<br>SNV               | NM_0011<br>27208 | p.Q1084P,TET2  | 0.0033       | Benign/Lik<br>ely Benign |
| 6517-<br>AB-231      | chr<br>4  | 105275843 | 105275843 | A   | G   | exonic     | TET2       | Nonsynon<br>SNV               | NM_0011<br>27208 | p.H1778R       | 0.0389       | Benign                   |
| 6969-<br>NH-20       | chr<br>20 | 32434666  | 32434666  | G   | A   | exonic     | ASXL1      | Nonsynon<br>SNV               | NM_0013<br>63734 | p.G591S,ASXL1  | 0.0067       | Benign/Lik<br>ely Benign |
| 6969-<br>NH-20       | chr<br>4  | 105234028 | 105234028 | C   | G   | exonic     | TET2       | Nonsynon<br>SNV               | NM_0011<br>27208 | p.P29R,TET2    | 0.0319       | Benign                   |
| 6969-<br>NH-36       | chr<br>6  | 43339661  | 43339661  | G   | A   | exonic     | ZNF31<br>8 | Nonsynon<br>SNV               | NM_0143<br>45    | p.P1446L       | 0.0101       | Benign                   |
| 6969-<br>NH-8        | chr<br>4  | 105235030 | 105235030 | C   | T   | exonic     | TET2       | Nonsynon<br>SNV               | NM_0011<br>27208 | p.P363L,TET2   | 0.0529       | Benign                   |
| 8412-<br>NH-111      | chr<br>4  | 105234042 | 105234042 | C   | T   | exonic     | TET2       | Nonsynon<br>SNV               | NM_0011<br>27208 | p.L34F,TET2    | 0.0168       | Benign                   |
| 8412-<br>NH-111      | chr<br>4  | 105234594 | 105234594 | G   | A   | exonic     | TET2       | Nonsynon<br>SNV               | NM_0011<br>27208 | p.V218M,TET2   | 0.0390       | Benign                   |
| 8618-<br>NH-005      | chr<br>4  | 54733102  | 54733103  | CC  | TA  | exonic     | KIT        | nonframeshift<br>substitution | NM_0002<br>22    | p.L799I,KIT    | 0.0282       | Benign/Lik<br>ely Benign |
| 8618-<br>NH-020      | chr<br>20 | 32436018  | 32436018  | G   | T   | exonic     | ASXL1      | Nonsynon<br>SNV               | NM_0013<br>63734 | p.E1041D,ASXL1 | 0.0105       | Benign/Lik<br>ely Benign |
| 8618-<br>NH-062      | chr<br>2  | 25749709  | 25749709  | A   | G   | exonic     | ASXL2      | Nonsynon<br>SNV               | NM_0013<br>69347 | p.V356A,ASXL2  | 0.0000       | NA                       |
| 8618-<br>NH-080      | chr<br>4  | 105234042 | 105234042 | C   | T   | exonic     | TET2       | Nonsynon<br>SNV               | NM_0011<br>27208 | p.L34F,TET2    | 0.0168       | Benign                   |
| 9077-<br>NH-<br>0074 | chr<br>4  | 105236541 | 105236541 | T   | C   | exonic     | TET2       | Nonsynon<br>SNV               | NM_0011<br>27208 | p.Y867H,TET2   | 0.0106       | Benign                   |
| 9077-<br>NH-<br>0074 | chr<br>4  | 105275843 | 105275843 | A   | G   | exonic     | TET2       | Nonsynon<br>SNV               | NM_0011<br>27208 | p.H1778R       | 0.0389       | Benign                   |
| 9077-<br>NH-<br>0074 | chr<br>6  | 43339632  | 43339632  | G   | C   | exonic     | ZNF31<br>8 | Nonsynon<br>SNV               | NM_0143<br>45    | p.P1456A       | 0.0002       | NA                       |
| 9077-<br>NH-<br>0076 | chr<br>6  | 43339907  | 43339907  | G   | A   | exonic     | ZNF31<br>8 | Nonsynon<br>SNV               | NM_0143<br>45    | p.S1364L       | 0.0041       | NA                       |
| 9532-<br>NH-<br>0032 | chr<br>4  | 105235030 | 105235030 | C   | T   | exonic     | TET2       | Nonsynon<br>SNV               | NM_0011<br>27208 | p.P363L,TET2   | 0.0529       | Benign                   |

**Supplementary Data Table 4. Non hematologic cancer in CHIVE patients**

| Non-Hematologic Cancer in CHIVE Patients |              |                 |                   |
|------------------------------------------|--------------|-----------------|-------------------|
|                                          | CH<br>(N=30) | No CH<br>(N=37) | Overall<br>(N=67) |
| <b>Cancer Type</b>                       |              |                 |                   |
| Bladder Cancer                           | 2 (6.9%)     | 1 (2.7%)        | 3 (4.5%)          |
| Breast cancer                            | 6 (20.7%)    | 15 (40.5%)      | 21 (31.8%)        |
| Colon cancer                             | 1 (3.4%)     | 2 (5.4%)        | 3 (4.5%)          |
| Large cell lung cancer                   | 1 (3.4%)     | 0 (0%)          | 1 (1.5%)          |
| MDS                                      | 1 (3.4%)     | 0 (0%)          | 1 (1.5%)          |
| Non-hodgkin's lymphoma                   | 1 (3.4%)     | 0 (0%)          | 1 (1.5%)          |
| NSCLC                                    | 2 (6.9%)     | 1 (2.7%)        | 3 (4.5%)          |
| Other                                    | 3 (10.3%)    | 6 (16.2%)       | 9 (13.6%)         |
| Ovarian cancer                           | 2 (6.9%)     | 2 (5.4%)        | 4 (6.1%)          |
| Pancreatic cancer                        | 2 (6.9%)     | 0 (0%)          | 2 (3.0%)          |
| Peritoneal cancer                        | 1 (3.4%)     | 0 (0%)          | 1 (1.5%)          |
| Prostate cancer                          | 5 (17.2%)    | 1 (2.7%)        | 6 (9.1%)          |
| Thyroid Cancer                           | 2 (6.9%)     | 2 (5.4%)        | 4 (6.1%)          |
| Basal Cell Carcinoma                     | 0 (0%)       | 3 (8.1%)        | 3 (4.5%)          |
| CML                                      | 0 (0%)       | 1 (2.7%)        | 1 (1.5%)          |
| Hepatic cancer                           | 0 (0%)       | 1 (2.7%)        | 1 (1.5%)          |
| Hodgkin's lymphoma                       | 0 (0%)       | 1 (2.7%)        | 1 (1.5%)          |
| Small cell lung cancer                   | 0 (0%)       | 1 (2.7%)        | 1 (1.5%)          |

**Supplementary Data Table 5: Deceased patients in CH+ and CH- groups and causes of death**

| Patient ID | CH Status | Cause of Death    |
|------------|-----------|-------------------|
| 006        | CH        | Pancreatic Cancer |
| 007        | CH        | Peritoneal Cancer |
| 009        | CH        | Septic Shock      |
| 012        | CH        | Breast Cancer     |
| 026        | CH        | AML               |
| 099        | CH        | Pancreatic Cancer |
| 054        | CH        | Septic Shock      |
| 016        | No CH     | Renal Failure     |
| 028        | No CH     | Trauma            |
